# Supplementary material
Source: publisher figshare collection journal article supplement (https://frontiersin.figshare.com/ndownloader/files/22449944)
Supplement: Supplementary file [file 22449944]

## *Supplementary Material*

The following Supporting Information is available for this article:

**Table S1:** Drought dataset (separate excel file)

**Table S2:** Control dataset (separate excel file)

**Methods S1:** Connection to canopy conductance

**Methods S2:** Numerical optimization routines

**Methods S3:** Implications for photosynthesis and carbon uptake

**Figure S1:** Leave-One-Out clustering examples

**Methods S1:** Connection to canopy conductance

Under steady-state conditions, the imposed transpiration flux balances the sapwood flux induced by the forcing pressure  $\Delta\psi(t)$  (McDowell et al., 2016; Whitehead, Edwards, & Jarvis, 1984).

Alongside the vapour pressure deficit and leaf conductivity,  $\Delta\psi$  is a main driver of transpiration, and is thus coupled to canopy conductance. The forcing pressure  $\Delta\psi$  and canopy conductivity can be linked by Darcy's law (McDowell et al., 2016). Adopting the mathematical definitions and nomenclature of Martínez-Vilalta *et al.*, (2014), we solve the canopy conductance  $g_C$  as follows:

$$g_C(t) = \frac{k_s A_s \Delta\psi(t)}{A_L VPD}, \quad (S1)$$

where  $A_s$  and  $A_L$  are the sapwood and leaf areas, respectively,  $k_s$  is the sapwood conductivity, and  $VPD$  denotes the vapour pressure deficit (all variables and their units are listed in Table 2).

As the leaf water potential and stomatal conductance are usually mutually dependent,  $\psi_L$  and  $g_C$  are also interdependent. Here we simplify Eq. (S1) such that  $g_C$  depends on  $\psi_L$  alone, and  $\psi_L$  is independent of  $g_C$ . Over the time scale of the  $g_C$  calculation (daily in this case), we assume that  $A_s$  and  $A_L$  are constant for a given plant canopy, meaning that  $k_s$  depends on  $\psi_L$  only through the possible induction of cavitation. Under this condition, the  $g_C$  dynamics of Eq. (S1) is a function of  $\psi_L$ ,  $\psi_s$  and  $VPD$  alone.

## **Methods S2:** Numerical optimization routines

We used three different heuristic minimization techniques: “random search”, “simulated annealing” and “differential evolution” to ensure that minimum parameter set found by the algorithms was global across the selected parameter domain. All minimization routines were translated into / implemented in CPP. The method “random search” method was implemented based on Archetti & Schoen, (1984) with fixed step size, the “differential evolution” implementation was based on Price, Storn, & Lampinen, (2005) and the “simulated annealing” method on Caires, Italiano, Monteiro, Palamidessi, & Yung, (2005).

Applying all three techniques to our dataset always results in an equal minimum parameter set (within a 5 decimal places). To further ensure quality of the minimization techniques, each algorithm was tested extensively with the test suite of Surjanovic, S; Bingham (2013).

We selected an implicit-midpoint-ordinary-differential-equation-solver for equation 8, because it combined system stiffness robustness with performance. Using a simple ‘explicit-Euler’ solver for equation 8 exhibited numerical instability for rapid changes in soil water potential.

**Methods S3:** Implications for photosynthesis and carbon uptake

These boundary cases are defined as follows (Roman et al., 2015).

- Case 1: Extreme isohydric behavior: the change of  $\psi_L(t)$  with respect to  $\psi_s(t)$  is zero ( $\frac{d\psi_L}{d\psi_s} = 0$ ). In this case,  $\psi_L$  is constant and  $\Delta\psi$  decreases as the soil dries. By Eq. (S1), a decrease in  $\Delta\psi$  implies a decrease in  $g_C$ , reduced transpiration, and consequent reduction in photosynthesis and carbon uptake.
- Case 2: Perfect isohydrodynamic behavior: the change of  $\psi_L$  with respect to  $\psi_s$  is equal to one ( $\frac{d\psi_L}{d\psi_s} = 1$ ). In this case,  $\psi_L$  adjusts to maintain a constant  $\Delta\psi$  as the soil dehydrates. Keeping  $\Delta\psi$  constant requires maintaining a high  $g_C$ , ensuring that transpiration and photosynthesis continue under increasingly dry conditions. However, xylem cavitation under severe soil-moisture stress can decrease the  $g_C$ , thus lowering the xylem conductivity  $k_s$ .
- Case 3: Anisohydric behavior (Roman et al., 2015): the change of  $\psi_L$  with respect to  $\psi_s$  exceeds unity ( $\frac{d\psi_L}{d\psi_s} > 1$ ). Under drought stress, anisohydric plants adjust their  $\psi_L$  until  $\Delta\psi$  actually increases. Plants adopting this strategy maintain a high  $g_C$  and high transpiration- and photosynthesis rates, even under strong drought stress. Loss of xylem conductivity  $k_s$  induced by cavitation is compensated by the decrease in  $\psi_L$  and increase in  $\Delta\psi$ .

Note that the classical isohydricity concept assumes an interdependence between the stomatal behavior and water potential regulation. We provide a possibility to connect leaf water potential regulation to the stomatal conductivity in Eq. (S1).

**Figure S1:**

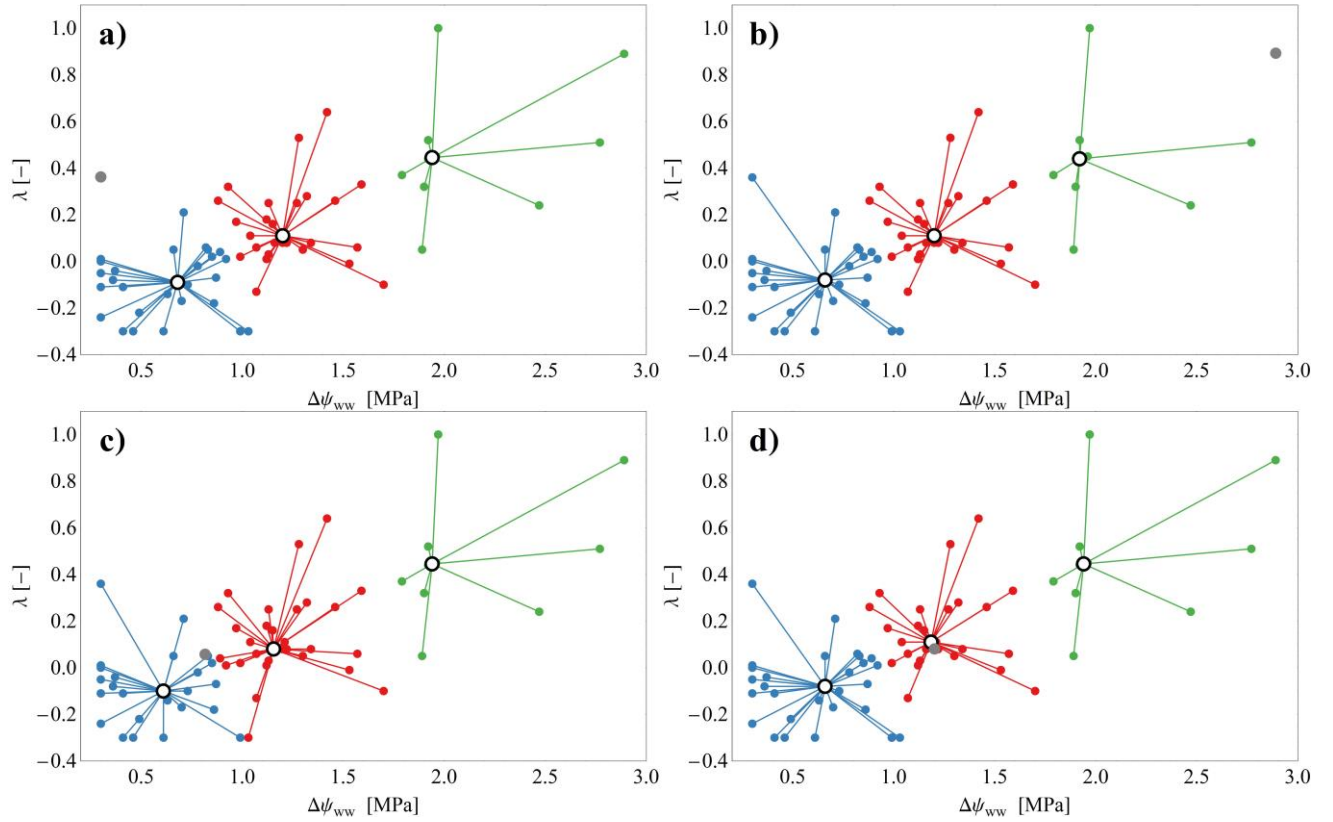

KMeans clustering based on the Leave-One-Out approach. Blue, red and green points belong to the clustering groups A, B and C, respectively. The gray point is the test dataset which reduces to one single point according to the Leave-One-Out approach. Open circles are the centroids of each of the three clusters. a) Emerging clusters leaving out the 45<sup>th</sup> entry (gray point) of the drought dataset: (0.3 MPa, 0.36). b) Emerging clusters leaving out the 64<sup>th</sup> entry (gray point) of the drought dataset: (2.9 MPa, 0.8). c) Emerging clusters leaving out the 8<sup>th</sup> entry (gray point) of the drought dataset: (0.8 MPa, 0.06). d) Emerging clusters leaving out the 16<sup>th</sup> entry (gray point) of the drought dataset: (1.2 MPa, 0.11)



## References

- Archetti, F., & Schoen, F. (1984). A survey on the global optimization problem: General theory and computational approaches. *Annals of Operations Research*, 1(2), 87–110.  
<https://doi.org/10.1007/BF01876141>
- Caires, L., Italiano, G. F., Monteiro, L., Palamidessi, C., & Yung, M. (2005). *Automata, Languages and Programming* (L. Caires, G. F. Italiano, L. Monteiro, C. Palamidessi, & M. Yung, eds.).  
<https://doi.org/10.1007/11523468>
- Martínez-Vilalta, J., Poyatos, R., Aguadé, D., Retana, J., & Mencuccini, M. (2014). A new look at water transport regulation in plants. *New Phytologist*, 204(1), 105–115.  
<https://doi.org/10.1111/nph.12912>
- McDowell, N. G., Williams, A. P., Xu, C., Pockman, W. T., Dickman, L. T., Sevanto, S., ... Koven, C. (2016). Multi-scale predictions of massive conifer mortality due to chronic temperature rise. *Nature Climate Change*, 6(3), 295–300. <https://doi.org/10.1038/nclimate2873>
- Price, K. V., Storn, R. M., & Lampinen, J. A. (Eds.). (2005). *Differential Evolution - A Practical Approach to Global Optimization*. <https://doi.org/10.1007/3-540-31306-0>
- Roman, D. T., Novick, K. A., Brzostek, E. R., Dragoni, D., Rahman, F., & Phillips, R. P. (2015). The role of isohydric and anisohydric species in determining ecosystem-scale response to severe drought. *Oecologia*, 179(3), 641–654. <https://doi.org/10.1007/s00442-015-3380-9>
- Surjanovic, S; Bingham, D. (2013). Virtual Library of Simulation Experiments: Test Functions and Datasets. Retrieved from <http://www.sfu.ca/~ssurjano>

Whitehead, D., Edwards, W. R. N., & Jarvis, P. G. (1984). Conducting sapwood area, foliage area, and permeability in mature trees of *Picea sitchensis* and *Pinus contorta*. *Canadian Journal of Forest Research*, 14(6), 940–947. <https://doi.org/10.1139/x84-166>
